# Supplementary material for: Fracture Characteristics of Commercial PEEK Dental Crowns: Combining the Effects of Aging Time and TiO2 Content
Source: MDPI journal article supplement (doi:10.3390/polym15122720), 2023-06-17
Supplement: s1 [file s1]

## Supplementary Materials

# Fracture Characteristics of Commercial PEEK Dental Crowns: Combining the Effects of Aging Time and TiO<sub>2</sub> Content

by Wen-Ju Lu, Wei-Cheng Chen, Viritpon Srimaneepong, Chiang-Sang Chen, Chang-Hung Huang, Hui-Ching Lin, Oi-Hong Tung and Her-Hsiung Huang

### 1. Glass transition region analysis

Differential scanning calorimetry (DSC) (DSC 4000, PerkinElmer, Shelton, USA) analysis was performed on the test PEEK crowns with and without 10-h aging treatment, including BreW (no aging), BreW (10-h aging), BreA (no aging), and BreA (10-h aging), to estimate whether the glass transition region (T<sub>g</sub> approximately 151 °C [14]) was different among the test groups. The test sample weighing approximately 10 mg was encapsulated in a sealed aluminum pan, heated with a temperature ramp of 6 °C/min from room temperature to about 200 °C, then cooled from 200 °C to room temperature under nitrogen flow of 20 mL/min. Each analysis was performed twice.

Figure S1 presents the DSC analysis results, showing no significant difference in the glass transition region among the test groups. This implied that the 10-h aging and TiO<sub>2</sub> content (20 or 30 %) did not have significant effect on the glass transition region of commercial dental PEEK crowns used in this study.

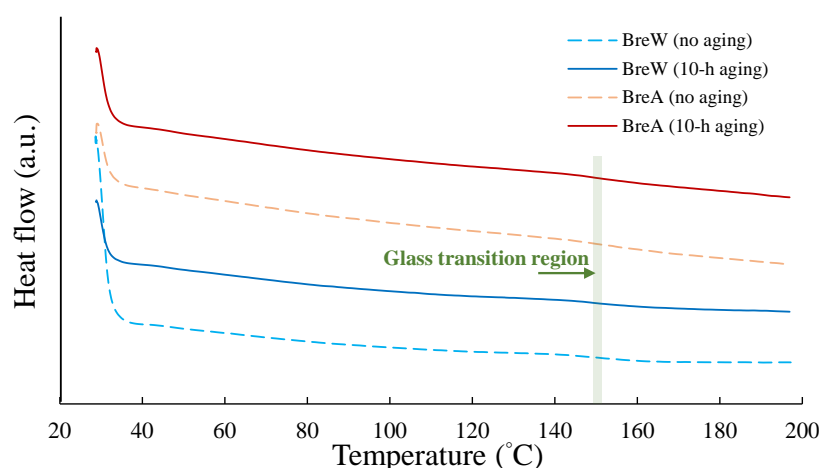

**Figure S1.** DSC curves (second heating) for the test PEEK crowns, showing no significant difference in the glass transition region among the test four groups.
